# Supplementary material
Source: PubMed Central journal article supplement (PMC5048684)
Supplement: NIHMS818657-supplement-Supplemental.pdf [file NIHMS818657-supplement-Supplemental.pdf]

SUPPLEMENTARY INFORMATION FOR:

# Substrate Dependent Native Luminescence From Cytochromes P450 3A4, 2C9 and P450cam

*Carlo Barnaba†, Sara C. Humphreys†, Adam O. Barden, Jeffrey P. Jones\*, and James A. Brozik\**

†Department of Chemistry, Washington State University, PO Box 644630, Pullman, Washington  
99164-4630, United States

## **Table of Contents:**

|                                                                               |    |
|-------------------------------------------------------------------------------|----|
| (1) Data Reduction for CYP3A4 Luminescence Spectrum .....                     | S1 |
| (2) Data Reduction for CYP3C9 Luminescence Spectrum.....                      | S2 |
| (3) Luminescence Spectra at 400nm, 409nm, 418nm, 425nm, 432nm Excitation..... | S3 |

## Data Reduction for CYP3A4 Luminescence Spectrum

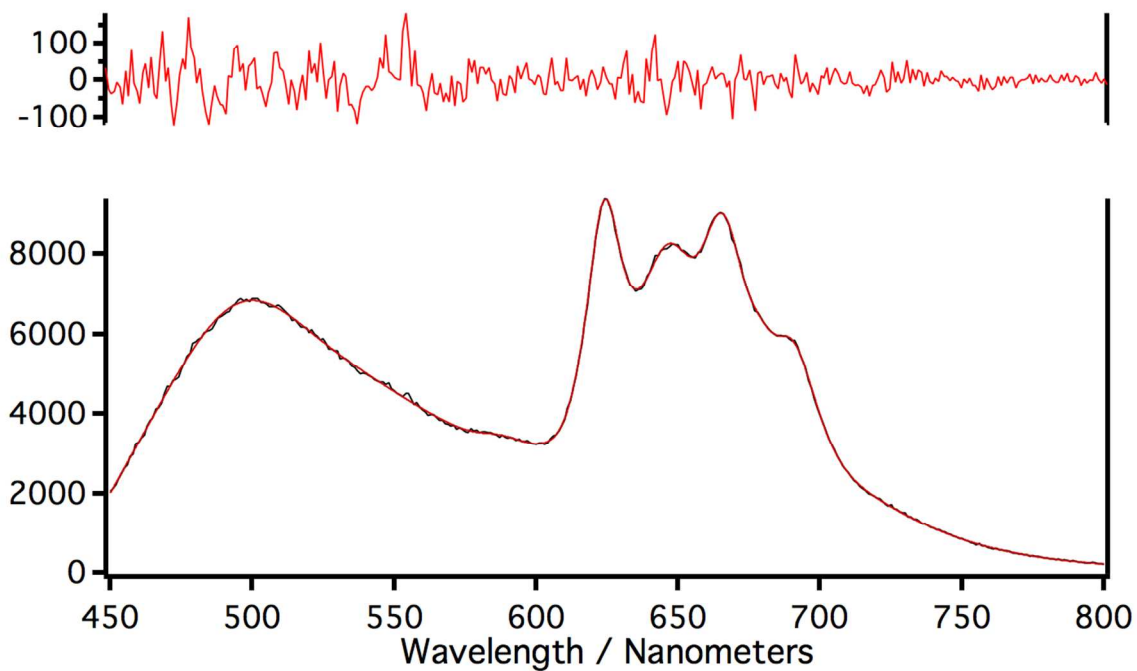

**Figure S1.** Smoothing of Luminescence data for CYP3A4. **Lower panel:** Solid black line is the luminescence spectrum after a background subtraction to remove the water Raman line and spectral irradiance correction (unsmoothed spectrum). The solid red line is after a Gaussian smoothing was applied (smoothed spectrum). **Upper panel:** Residual between the unsmoothed and smoothed spectra.

## Data Reduction for CYP2C9 Luminescence Spectrum

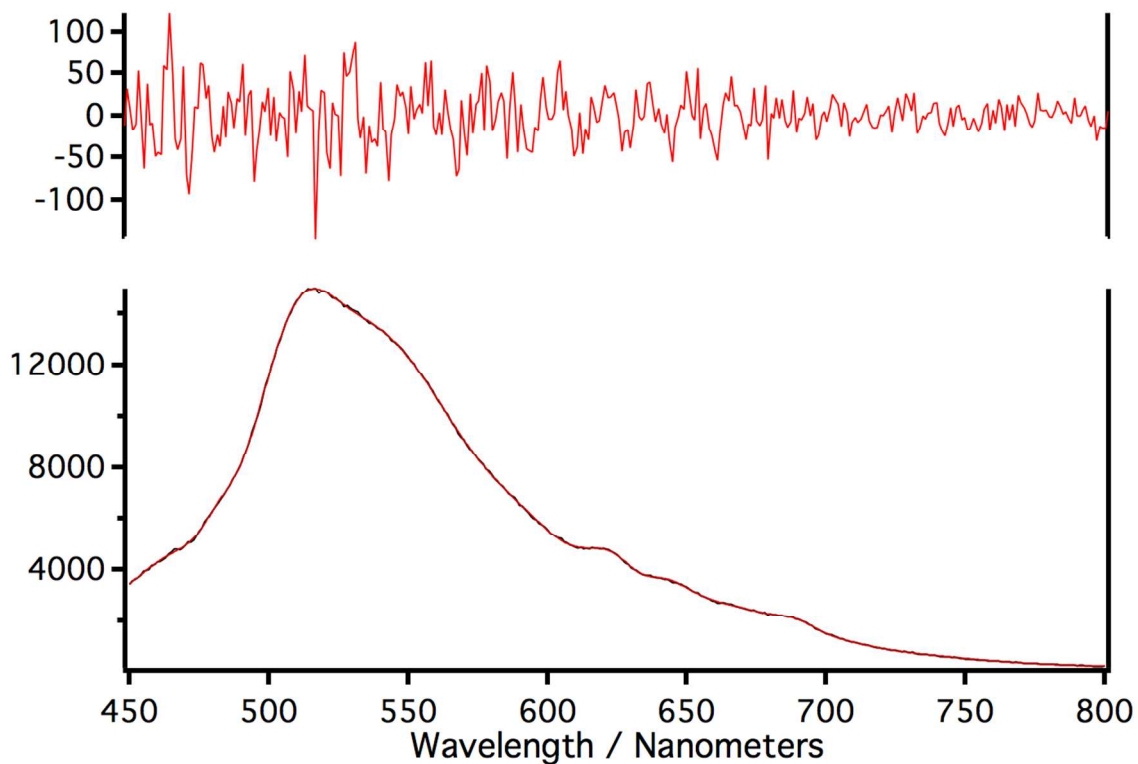

**Figure S2.** Smoothing of Luminescence data for CYP2C9. **Lower panel:** Solid black line is the luminescence spectrum after a background subtraction to remove the water Raman line and spectral irradiance correction (unsmoothed spectrum). The solid red line is after a Gaussian smoothing was applied (smoothed spectrum). **Upper panel:** Residual between the unsmoothed and smoothed spectra.

### Luminescence Spectra at 400nm, 409nm, 418nm, 425nm, 432nm Excitation

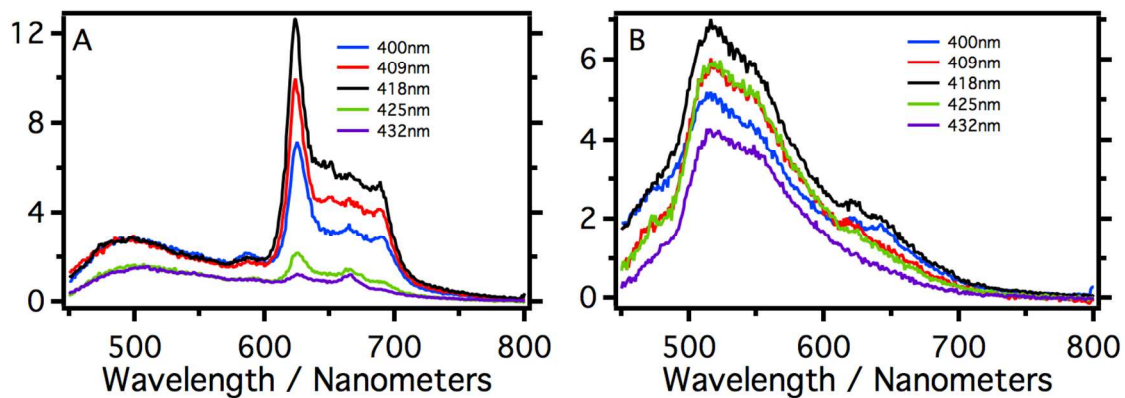

**Figure S3.** Luminescence spectra of CYP3A4 (A) and CYP2C9 (B) as a function of excitation wavelength. The experimental conditions are the same as the excitation spectra described in section 2.7. All spectra were spectral irradiance corrected.
